# Supplementary material for: Effective Menin inhibitor-based combinations against AML with MLL rearrangement or NPM1 mutation (NPM1c)
Source: PubMed Central journal article supplement (PMC8752621; doi:10.1038/s41408-021-00603-3), 2022-01-11
Supplement: 41408_2021_603_MOESM1_ESM.pdf [file 41408_2021_603_MOESM1_ESM.pdf]

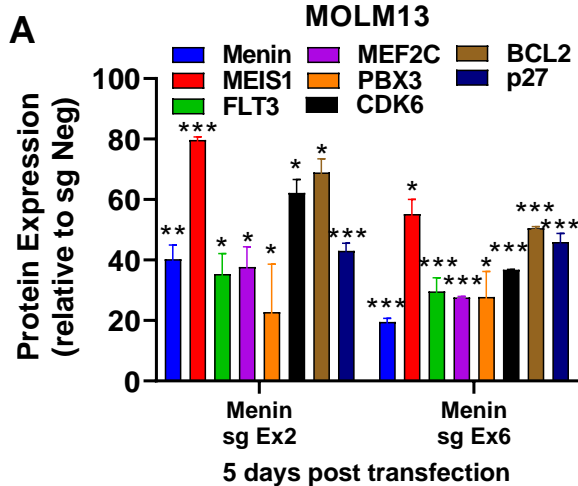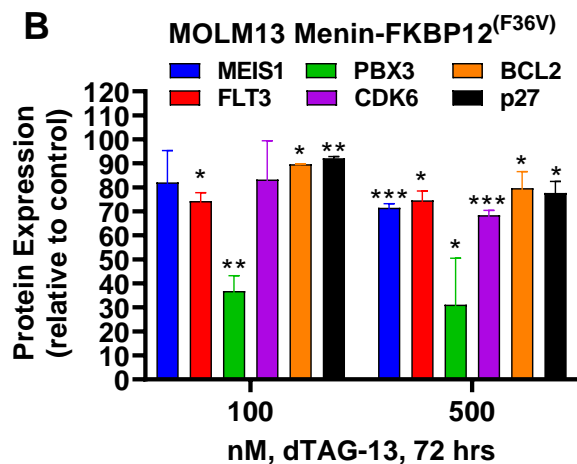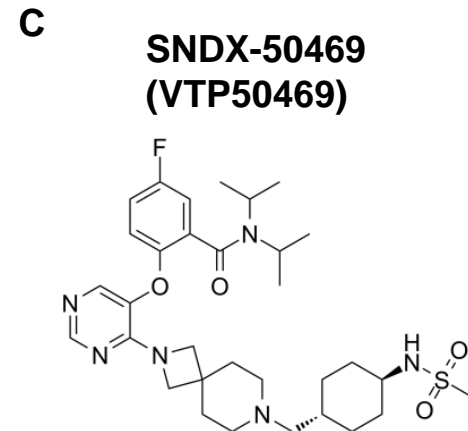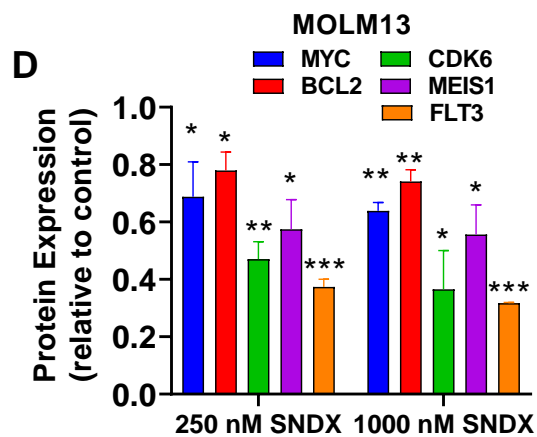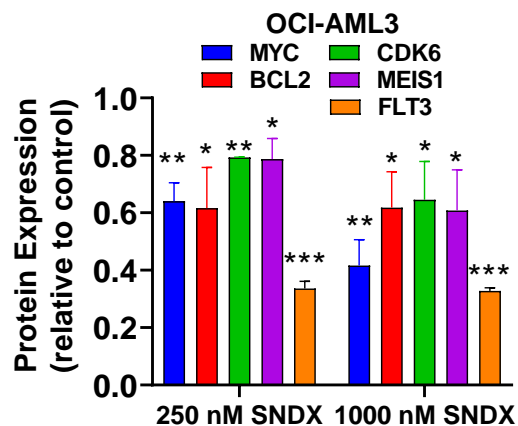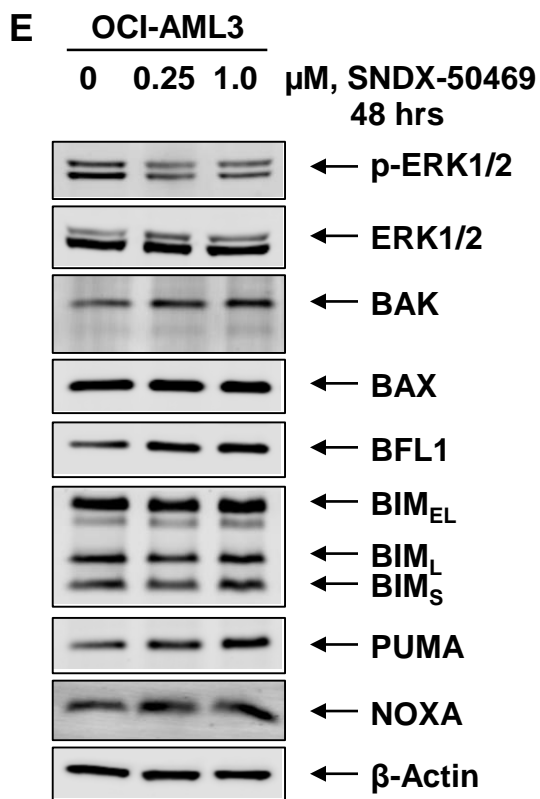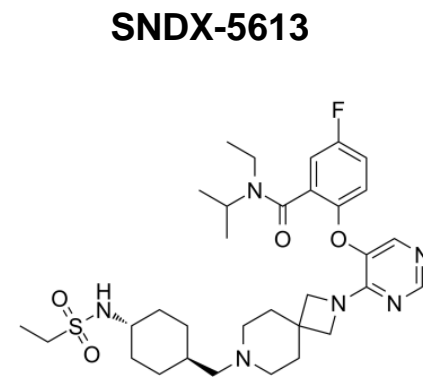

**Figure S1**

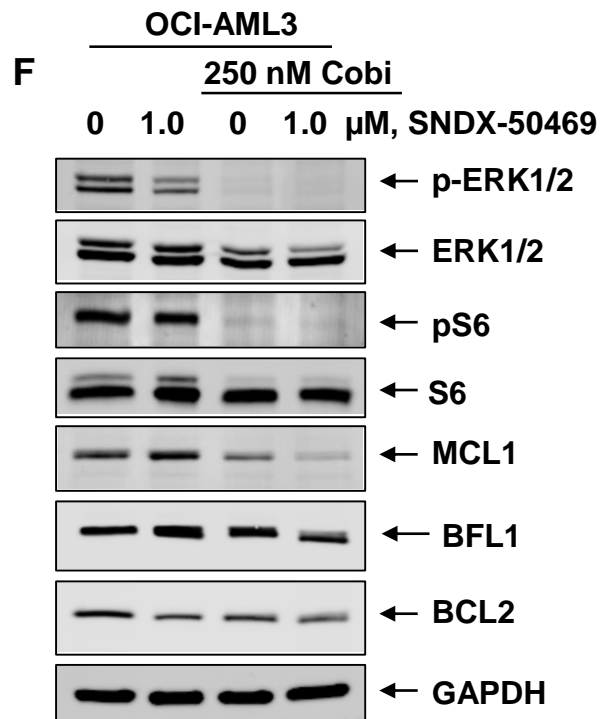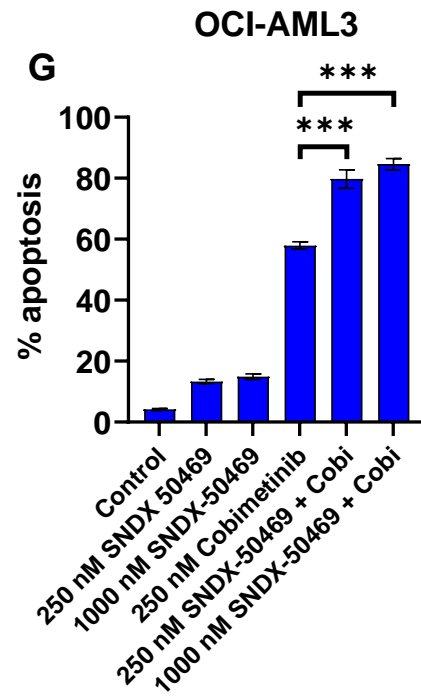

Figure S1

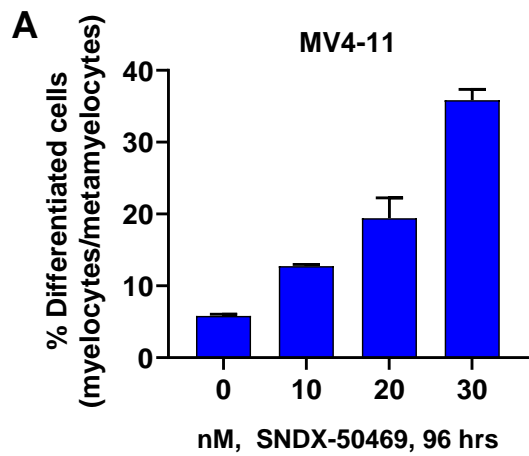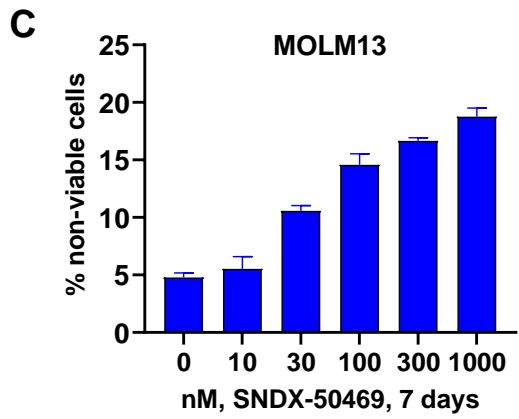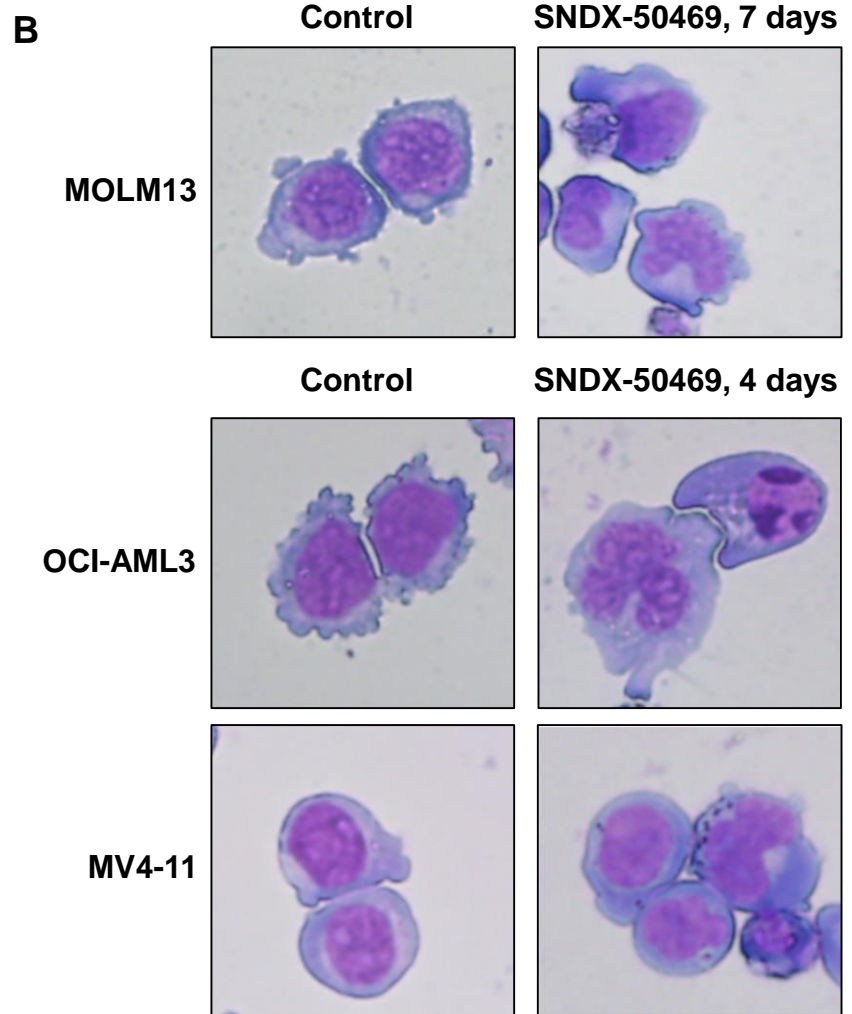

**Figure S2**

# MOLM13

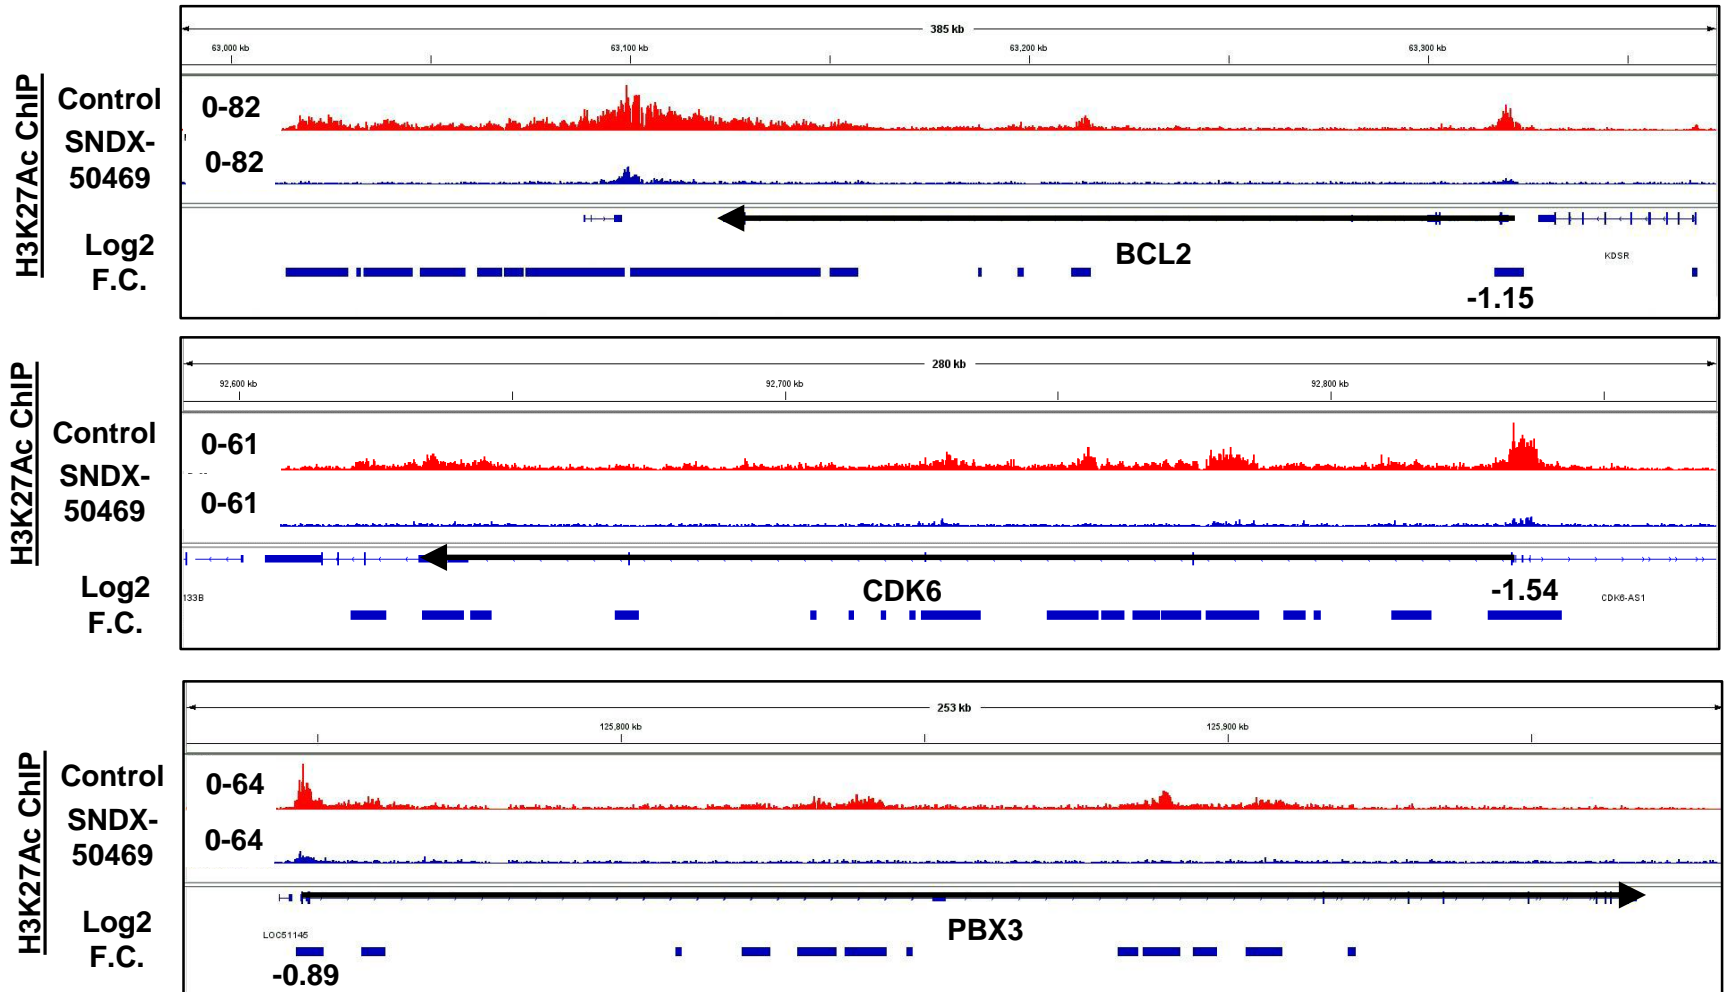

Figure S3

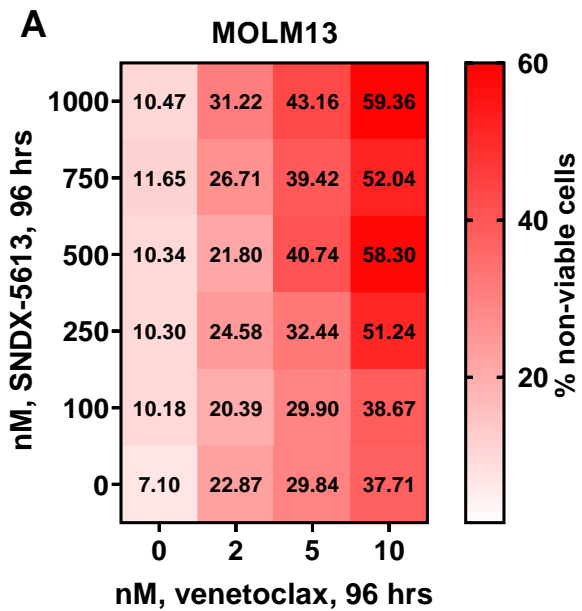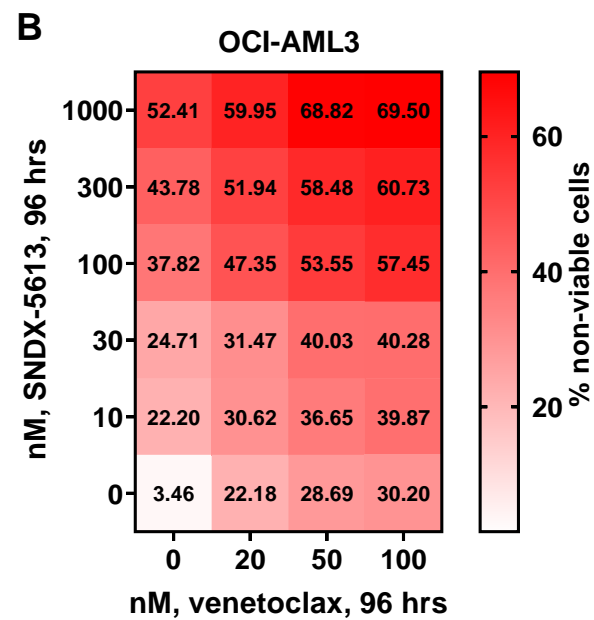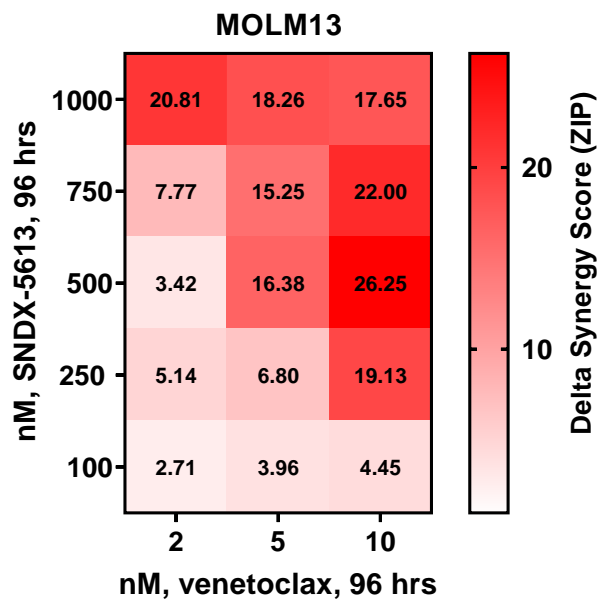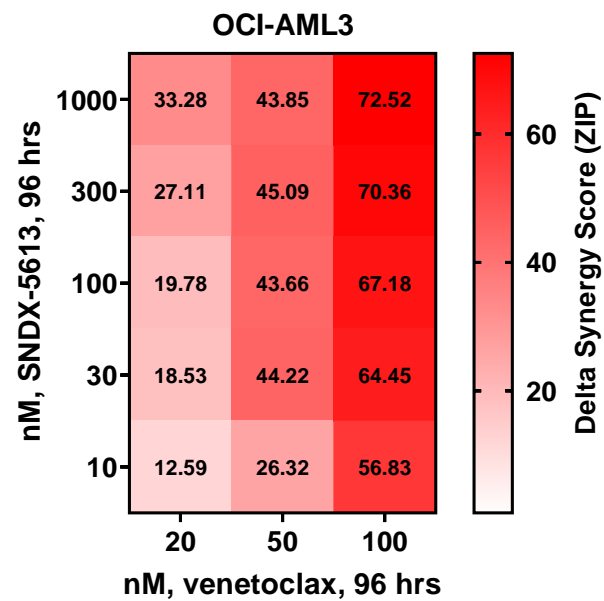

Figure S4

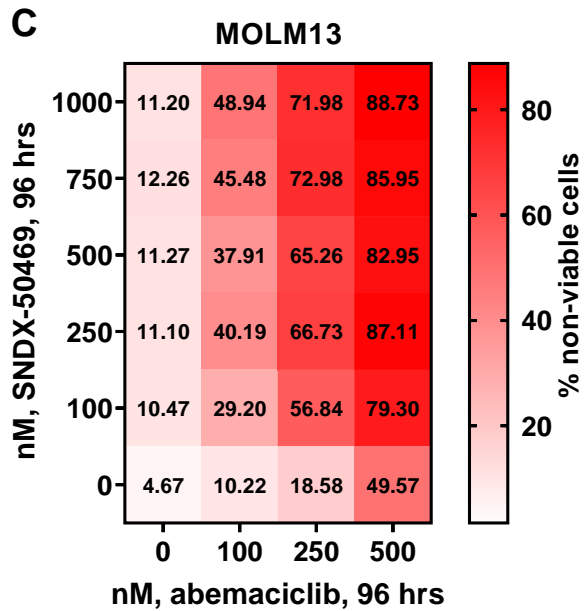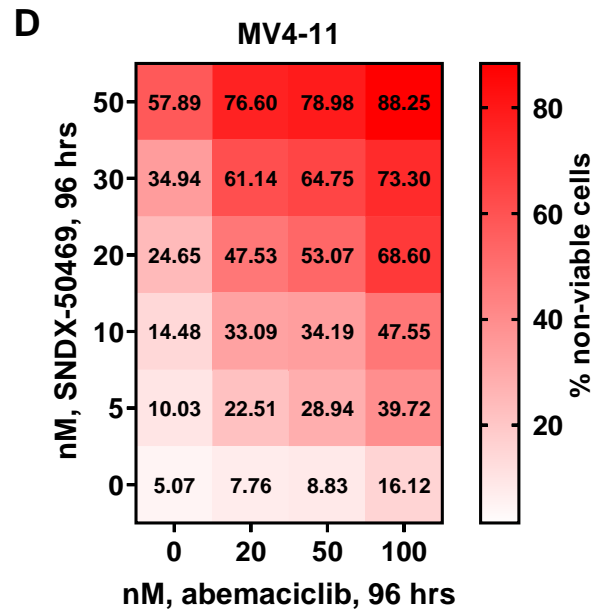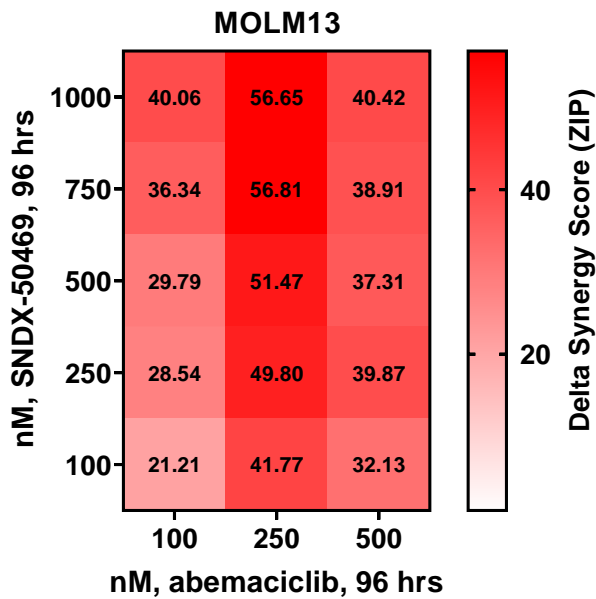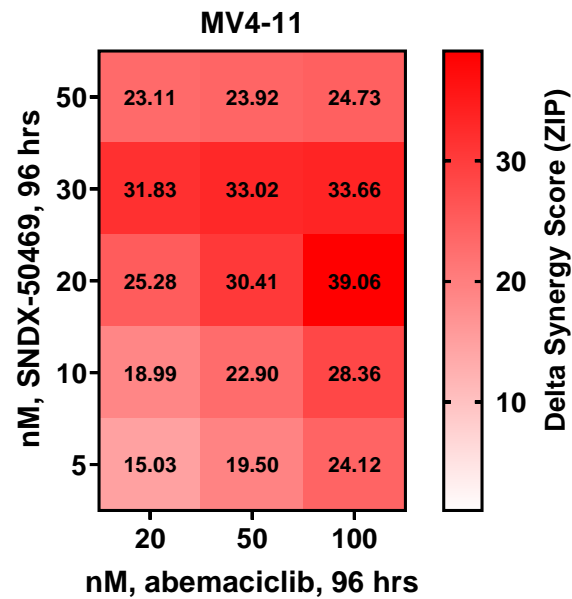

Figure S4

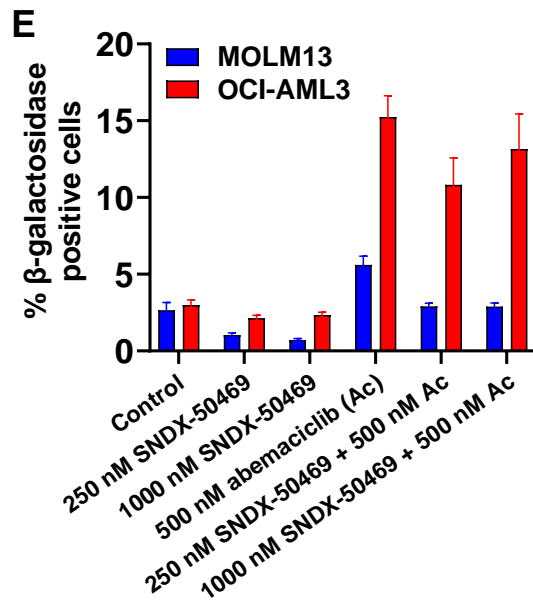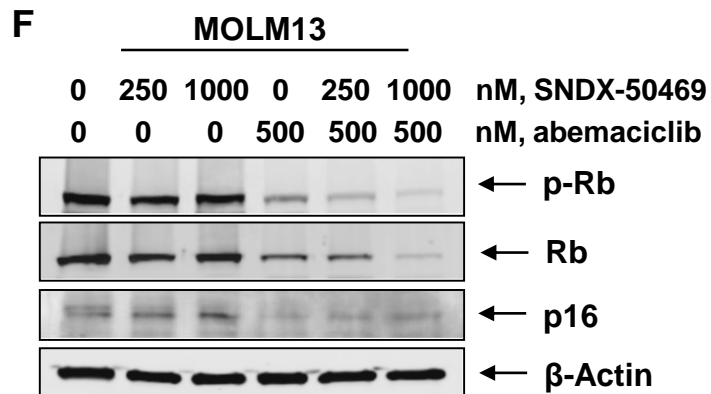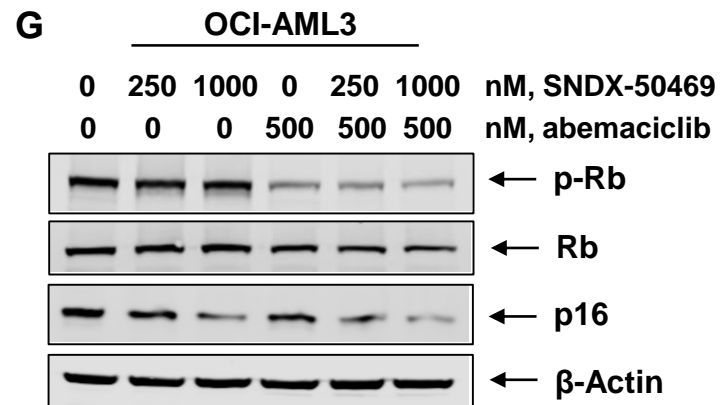

Figure S4

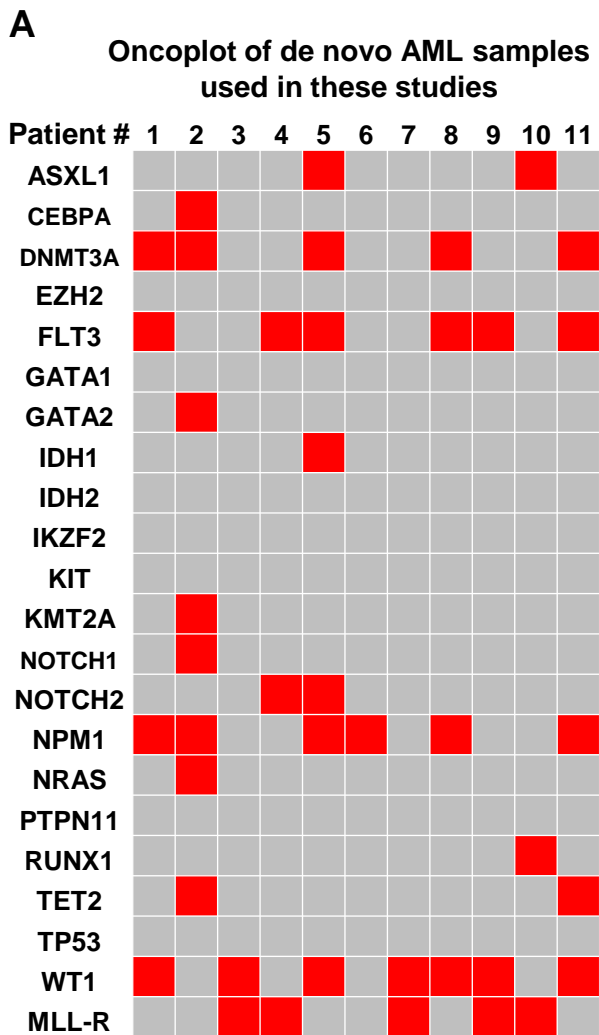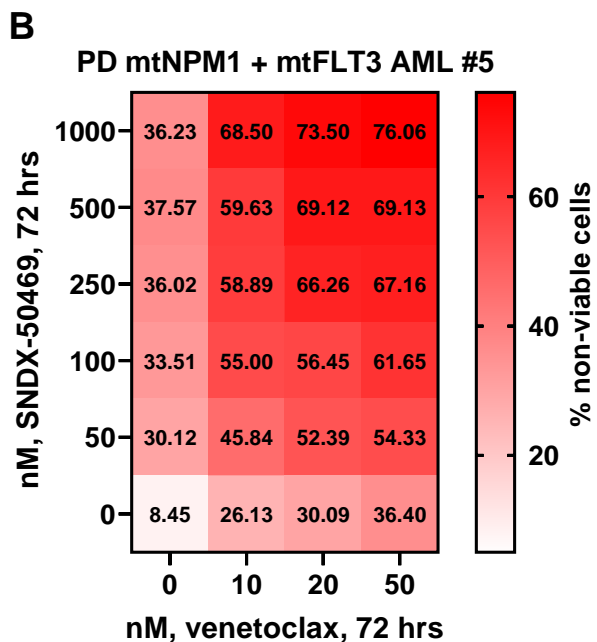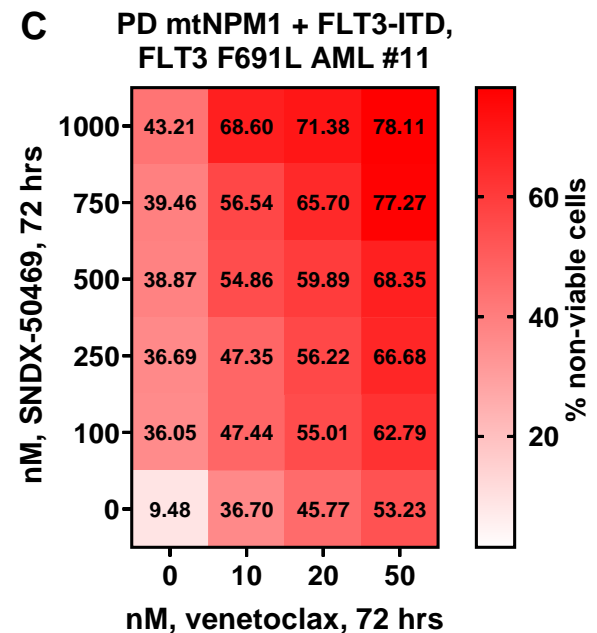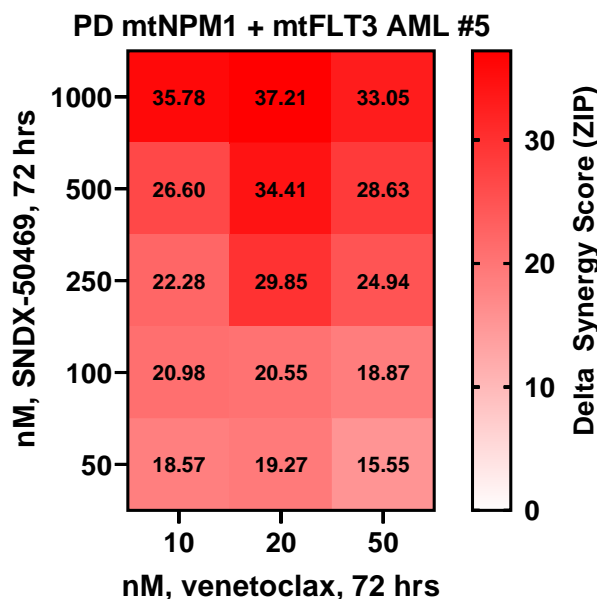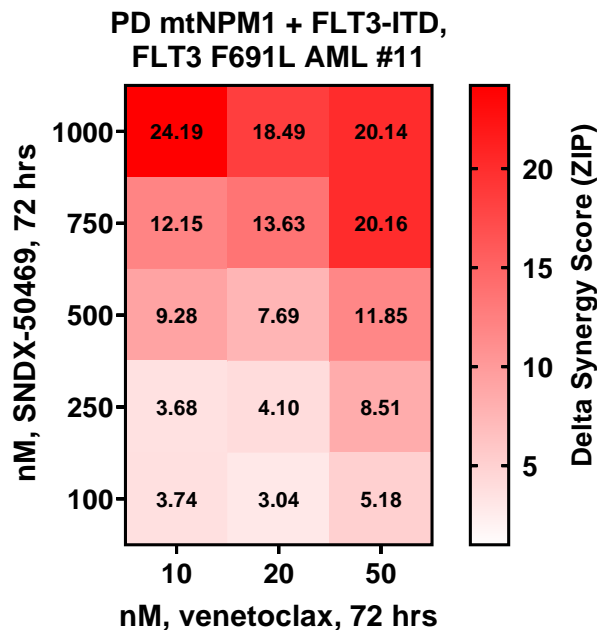

Figure S5



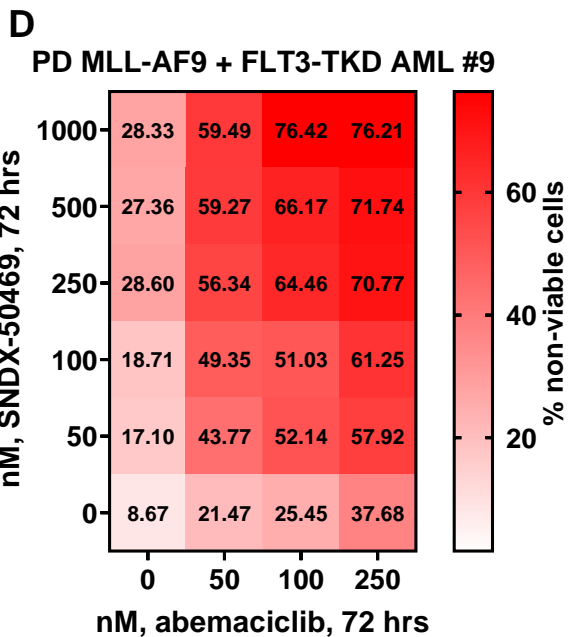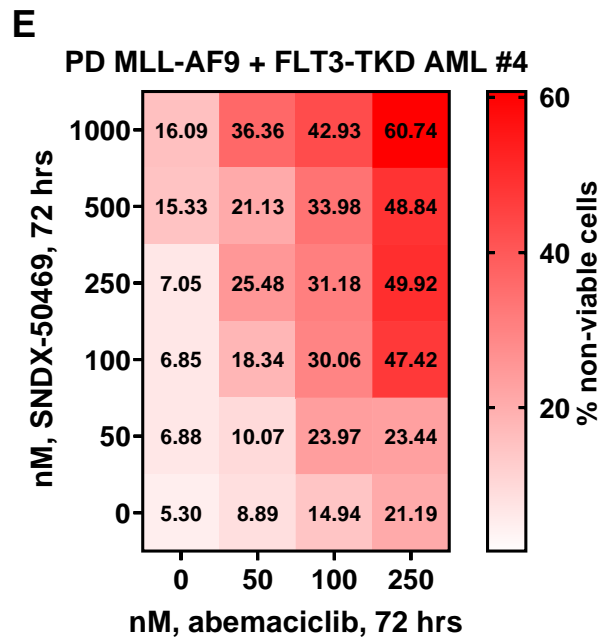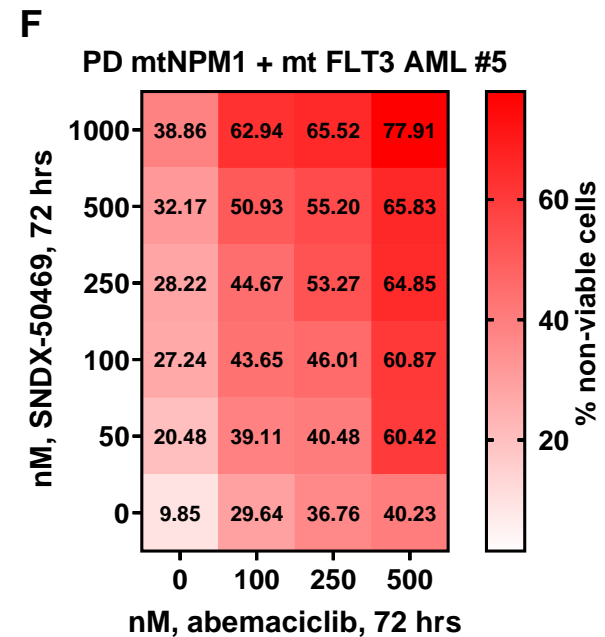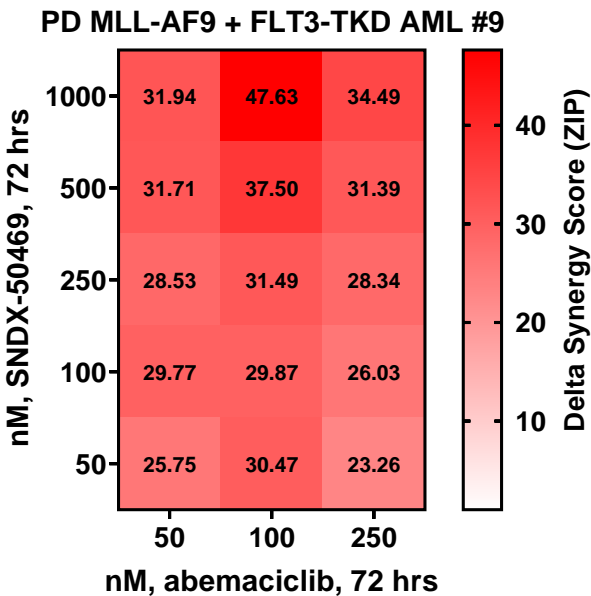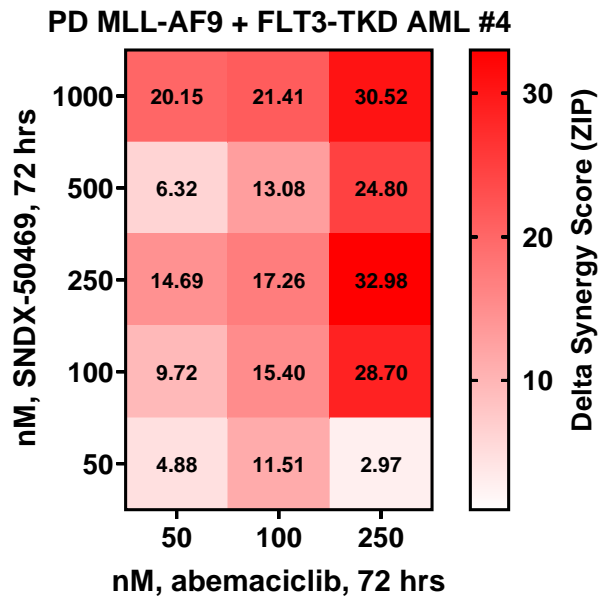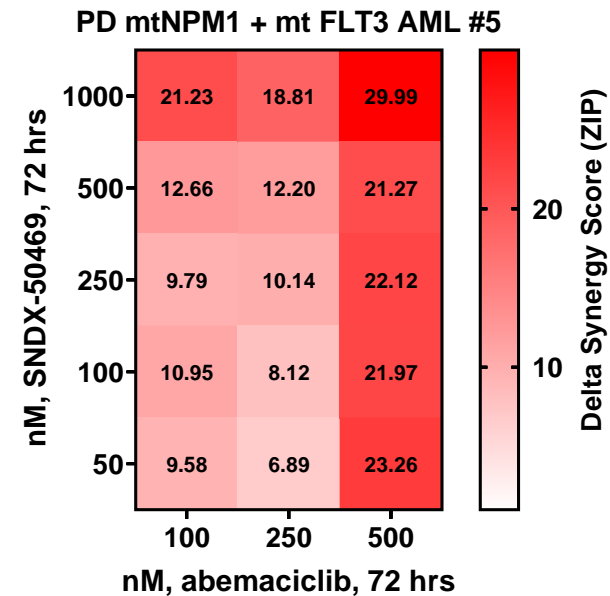

Figure S5

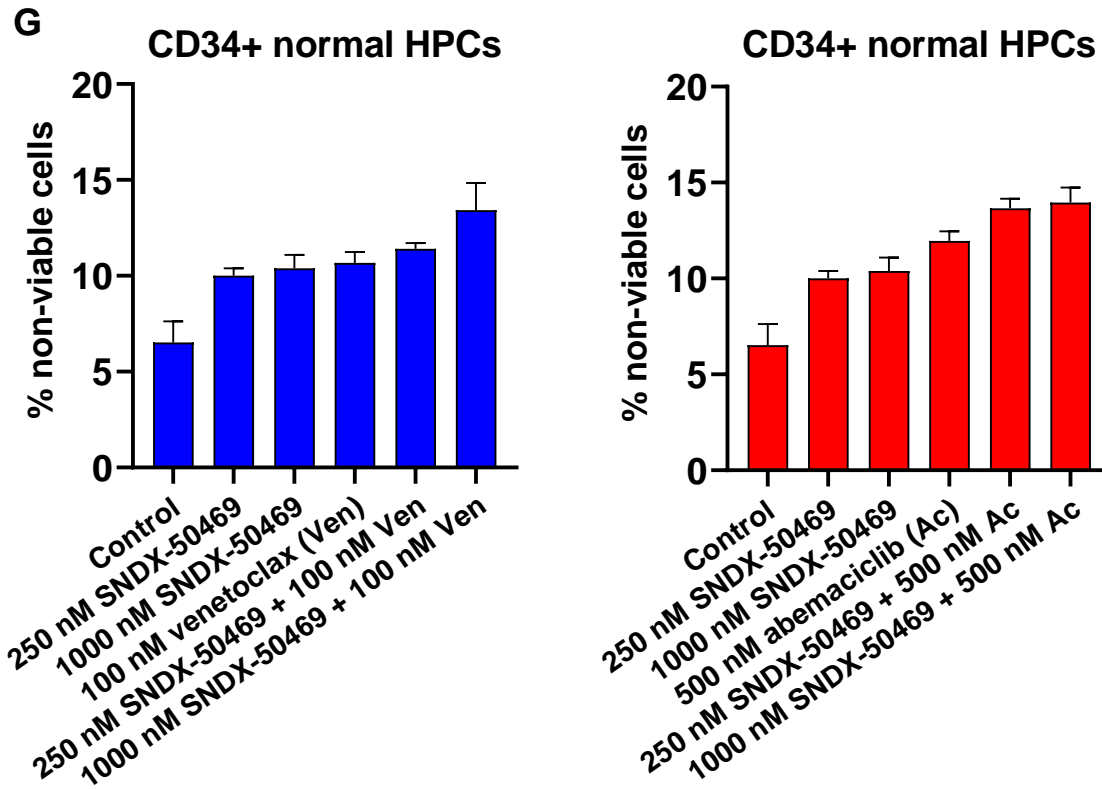

Figure S5

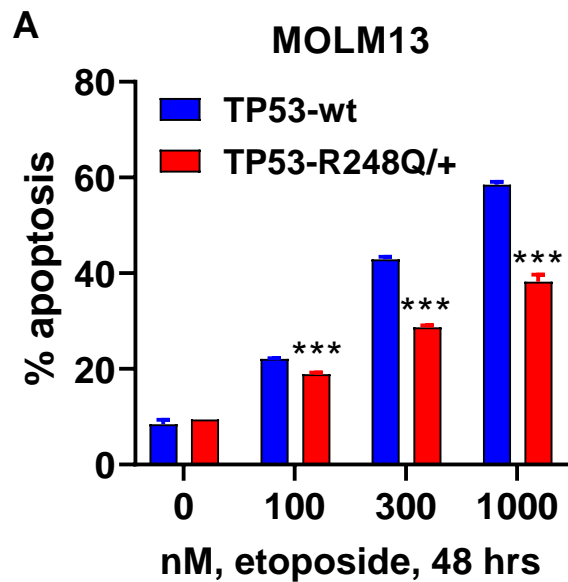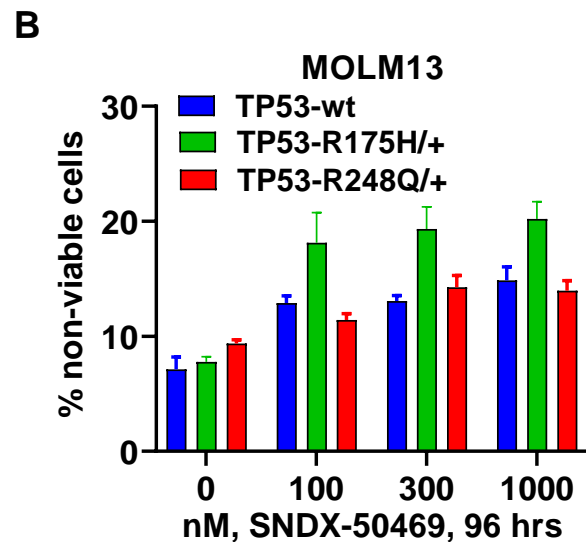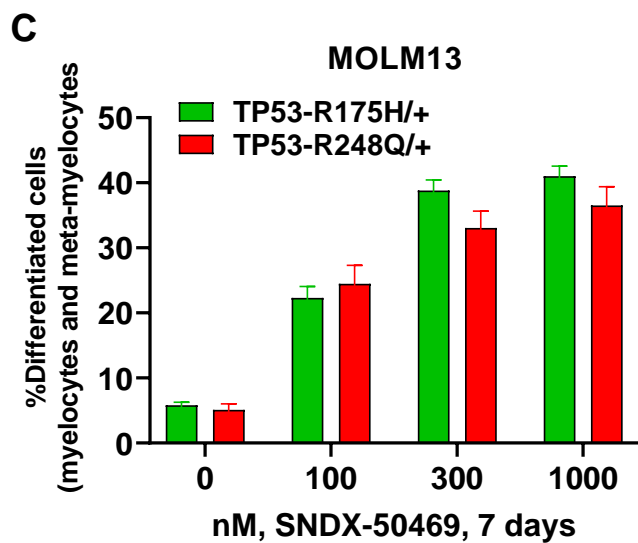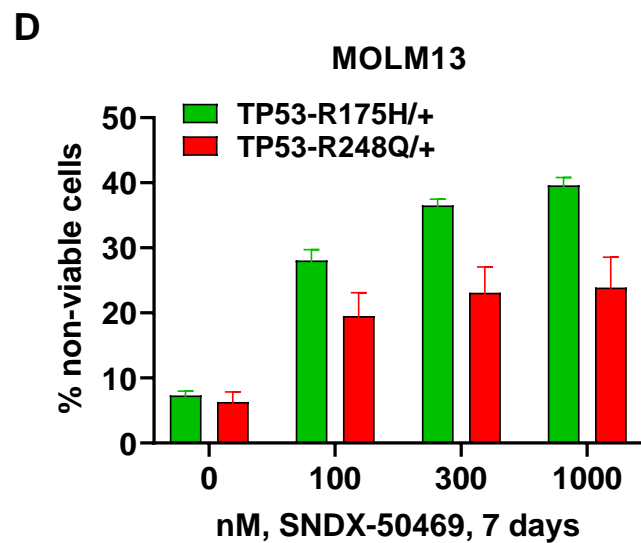

Figure S6

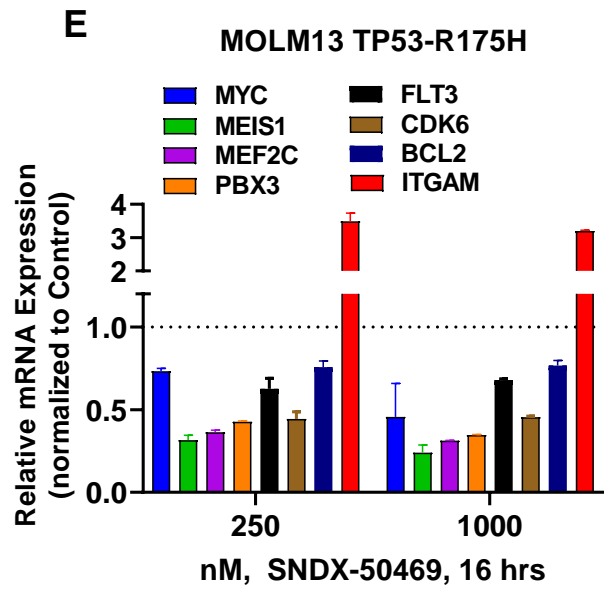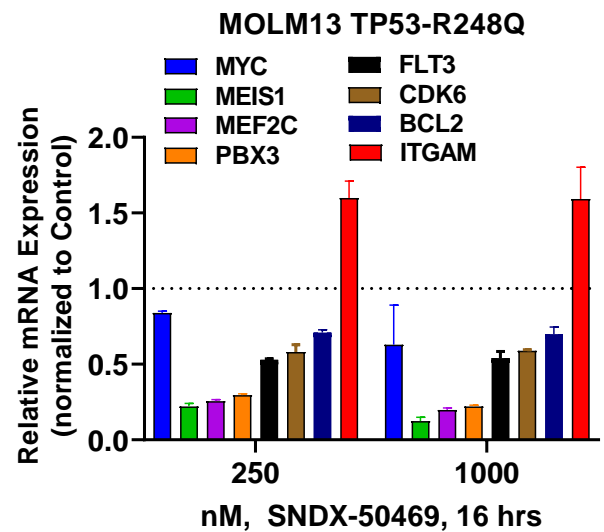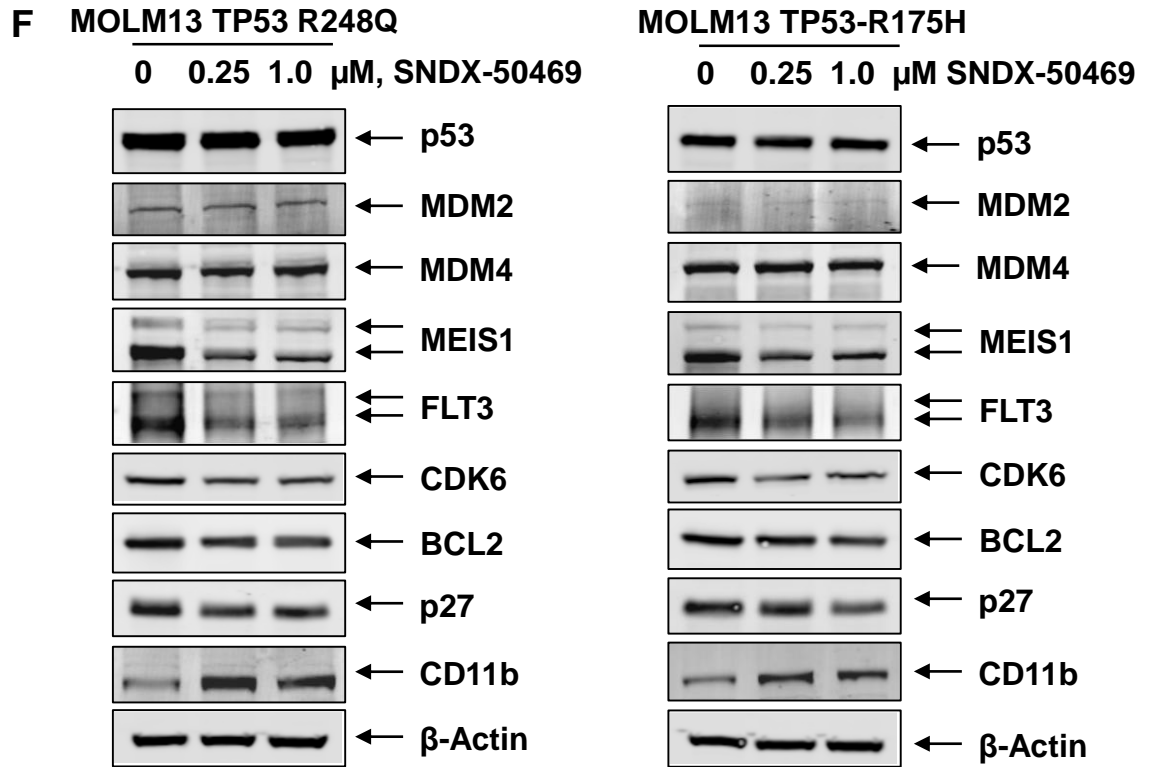

Figure S6

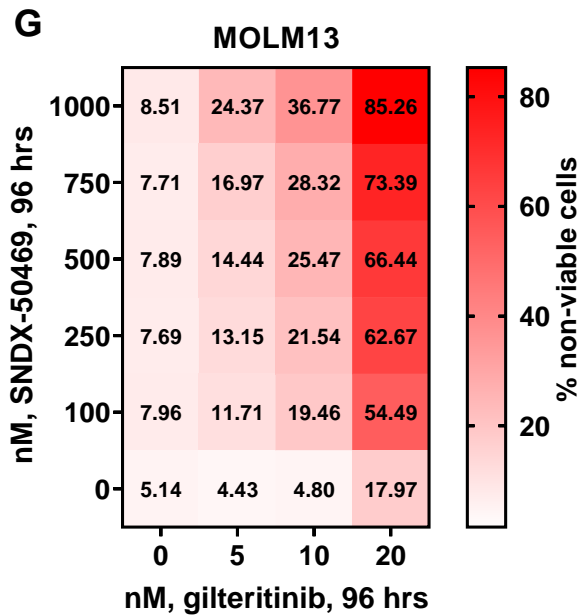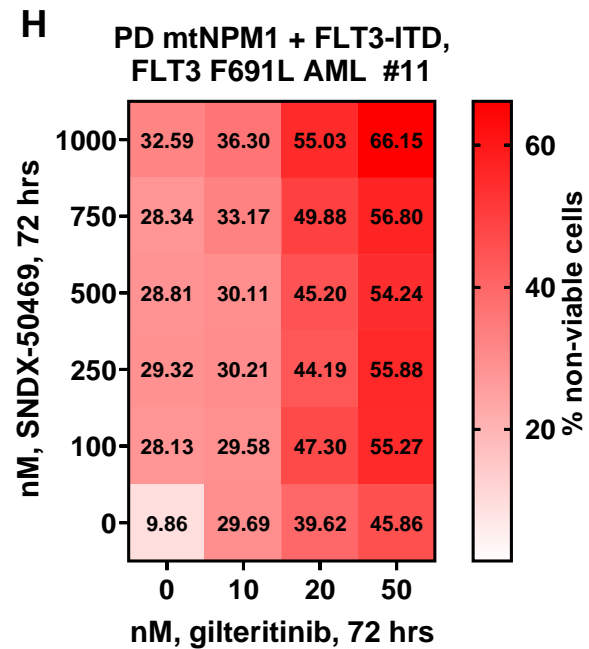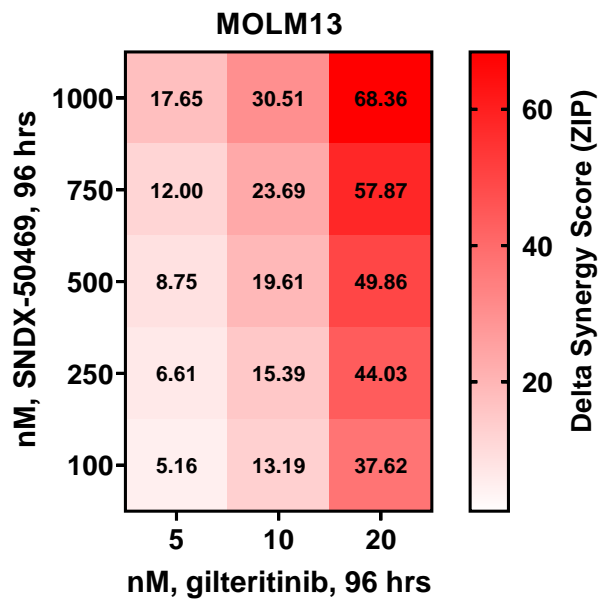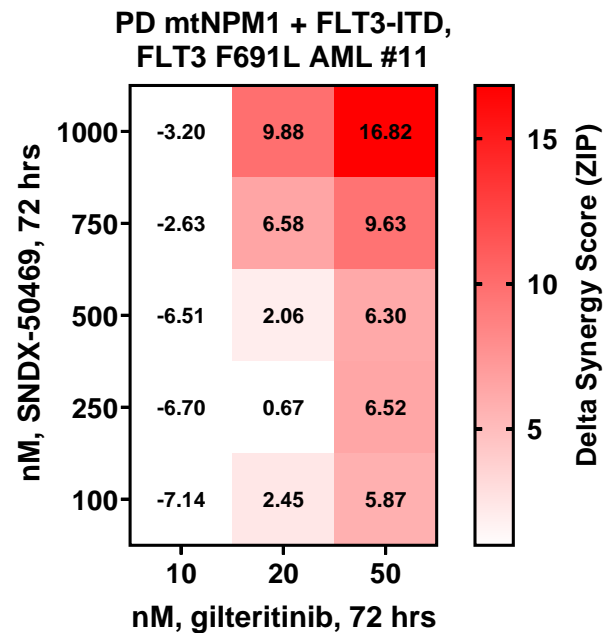

Figure S6

### Co-mutations in AML#4 PDX

| Gene   | Protein Change | Variant Allele Freq (VAF) |
|--------|----------------|---------------------------|
| FLT3   | N676T          | 0.917355                  |
| KMT2C  | C988F          | 0.363392                  |
| KMT2C  | Y987H          | 0.18362                   |
| KMT2C  | D348N          | 0.078125                  |
| KMT2C  | V919L          | 0.073446                  |
| KMT2C  | S990G          | 0.07                      |
| KMT2C  | G315S          | 0.04148                   |
| KMT2C  | R380L          | 0.041427                  |
| KMT2C  | R284Q          | 0.035762                  |
| KMT2C  | C391*          | 0.033722                  |
| KMT2C  | P309S          | 0.031927                  |
| KMT2D  | P2107T         | 0.521739                  |
| NOTCH2 | G225R          | 0.395604                  |
| NOTCH2 | C19W           | 0.448276                  |
| ARID1A | L1724R         | 0.448276                  |
| IRF8   | *427Yext*24    | 0.540881                  |
| ABCA7  | P1503L         | 0.539519                  |
| VPS13A | S734N          | 0.620079                  |

Table S1

**Table S2. In 190 patients with MLL1-r AML managed at M.D. Anderson Cancer Center (2012-2021), concurrent TP53 mutations were identified in 17 patients (~9%).**

| Patient Number | Cytogenetic Alteration (MLL rearrangement) | Nucleotide alteration in TP53 | Protein alteration in TP53        |
|----------------|--------------------------------------------|-------------------------------|-----------------------------------|
| 1              | t(9;11)(p22;q23)                           | c.659A>G                      | p.Y220C                           |
| 2              | t(9;11)(p22;q23)                           | c.542G>C                      | p.R181P                           |
| 3              | t(5;11)(p14;q23)                           | c.399_406del                  | p.M133fs*13                       |
| 4              | t(4;11)(q21;q23)                           | c.845_860delins31             | p.R282_E287delinsPSVGS LPE<br>EEE |
| 5              | t(4;11)(q21;q23)                           | c.845_846insAATATG            | p.R282_R283ins                    |
| 6              | t(4;11)(q21;q23)                           | c.524G>A                      | p.R175H                           |
| 7              | t(4;11)(q21;q23)                           | c.817C>A                      | p.R273S                           |
| 8              | t(4;11)(q21;q23)                           | c.845G>C                      | p.R282P                           |
| 9              | t(4;11)(q21;q23)                           | c.488A>C                      | p.Y163S                           |
| 10             | t(4;11)(q21;q23)                           | c.818G>A                      | p.R273H                           |
| 11             | t(11;19)(q23;q13.3)                        | c.536A>G                      | p.H179R                           |
| 12             | t(11;18)(q23;q21.3)                        | c.139C>T                      | p.P47S                            |
| 13             | t(11;16)(q23;p13.3)                        | c.743G>A                      | p.R248Q                           |
| 14             | t(11;14)(q23;q32)                          | c.425dupC                     | p.V143fs                          |
| 15             | der(6)t(6;11)(q27;q23)                     | c.811G>T                      | p.E271*                           |
| 16             | der(4)t(4;11)(q21;q23)                     | c.845G>C                      | p.R282P                           |
| 17             | der(12)t(11;12)(q23;q22)                   | c.414dupC                     | p.K139fs                          |

## Co-mutations in AML# 5 PDX

| Gene    | Protein Change | Variant Allele Freq (VAF) |
|---------|----------------|---------------------------|
| DNMT3A  | R882H          | 0.487889                  |
| IDH1    | R132H          | 0.484305                  |
| NPM1    | W288Cfs*12     | 0.423358                  |
| FLT3    | V194M          | 0.450135                  |
| WT1     | H445Q          | 0.252137                  |
| KMT2C   | R284Q          | 0.059818                  |
| KMT2C   | P309S          | 0.138462                  |
| KMT2C   | D348N          | 0.084453                  |
| KMT2C   | C988F          | 0.217899                  |
| KMT2C   | Y987H          | 0.270115                  |
| NOTCH2  | C19W           | 0.416268                  |
| ZFH3    | G3517D         | 0.5625                    |
| PCLO    | S496P          | 0.079848                  |
| CCND3   | L132F          | 0.463158                  |
| CD36    | G217R          | 0.495017                  |
| ATM     | F858L          | 0.489914                  |
| CIITA   | S299F          | 0.446602                  |
| ZFH3    | R3381_Q3387del | 0.33119                   |
| NF1     | V1453A         | 0.478814                  |
| STAT5A  | P194L          | 0.477733                  |
| RNF213  | S2334N         | 0.995122                  |
| SMARCA4 | V720M          | 0.182266                  |
| ASXL1   | G704R          | 0.498818                  |
| GNAS    | R1023G         | 0.152589                  |
| ABCA7   | A799E          | 0.4875                    |
